# Supplementary material for: Cobalt Nanoparticles Supported on TiO2 for Highly Selective Formation of N-Benzylideneanilines from Nitroarenes and Benzaldehyde via Reductive Imination Reaction
Source: MDPI journal article supplement (doi:10.3390/catal14040272), 2024-04-17
Supplement: s1 [file s1]

Article

# Cobalt nanoparticles supported on $\text{TiO}_2$ for highly selective formation of *N*-benzylideneanilines from nitroarenes and benzaldehyde via reductive imination reaction.

Daniela González-Vera <sup>1</sup>, Tatiana M. Bustamante <sup>2</sup>, J. Noé Díaz de León <sup>3</sup>, Cecilia C. Torres <sup>4,\*</sup> and Cristian H. Campos <sup>1,\*</sup>

<sup>1</sup> Departamento de Físicoquímica, Facultad de Ciencias Químicas, Universidad de Concepción, Concepción 4070371, Chile; dagonzalezv@udec.cl

<sup>2</sup> Departamento de Ingeniería Química, Facultad de Ingeniería, Universidad de Concepción, Concepción 4070409, Chile; tatibustamante@udec.cl

<sup>3</sup> Universidad Nacional Autónoma de México, Centro de Nanociencias y Nanotecnología, Ensenada 22860, B.C, Mexico; noejd@ens.cnyn.unam.mx

<sup>4</sup> Departamento de Ciencias Químicas, Facultad de Ciencias Exactas, Universidad Andres Bello, Autopista Concepción-Talcahuano 7100, Talcahuano 4300866, Chile

\* Correspondence: cecilia.torres@unab.cl (C.C.T.); ccampos@udec.cl (C.H.C.)

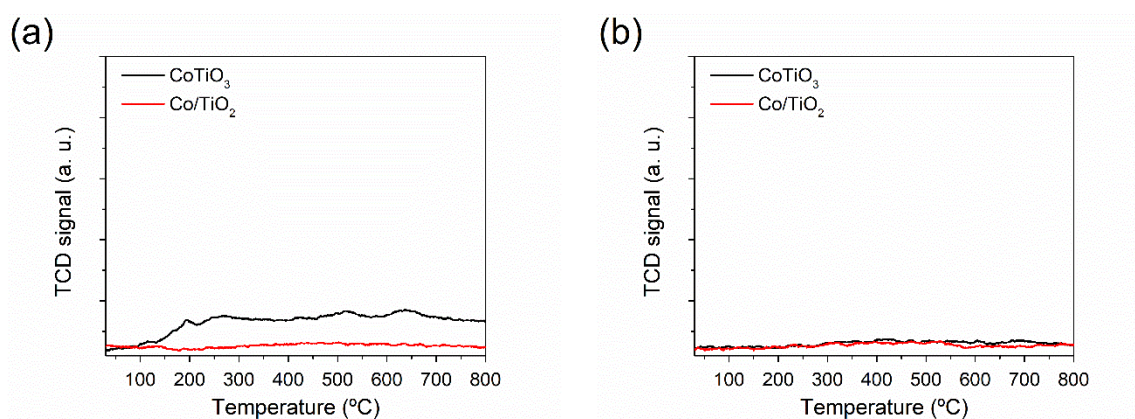

**Figure S1.** Temperature programed desorption experiments. (a)  $\text{NH}_3$  and (b)  $\text{CO}_2$

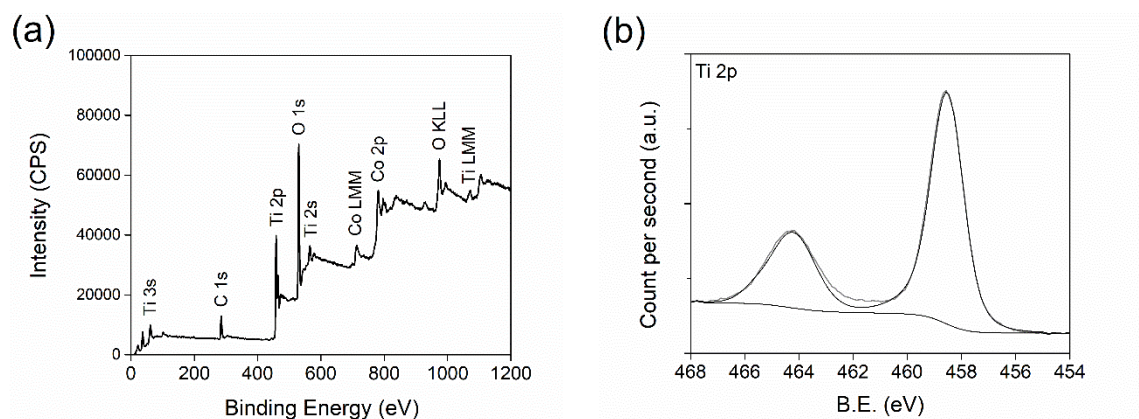

**Figure S2.** (a) XPS survey spectrum and (b) XPS high-resolution XPS scan spectra over Ti 2p.

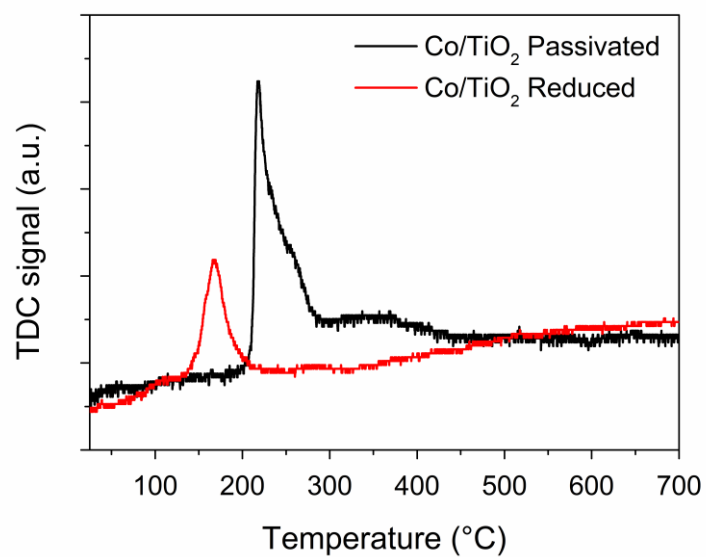

**Figure S3.** TPR characterization of passivated Co/TiO<sub>2</sub> catalyst.

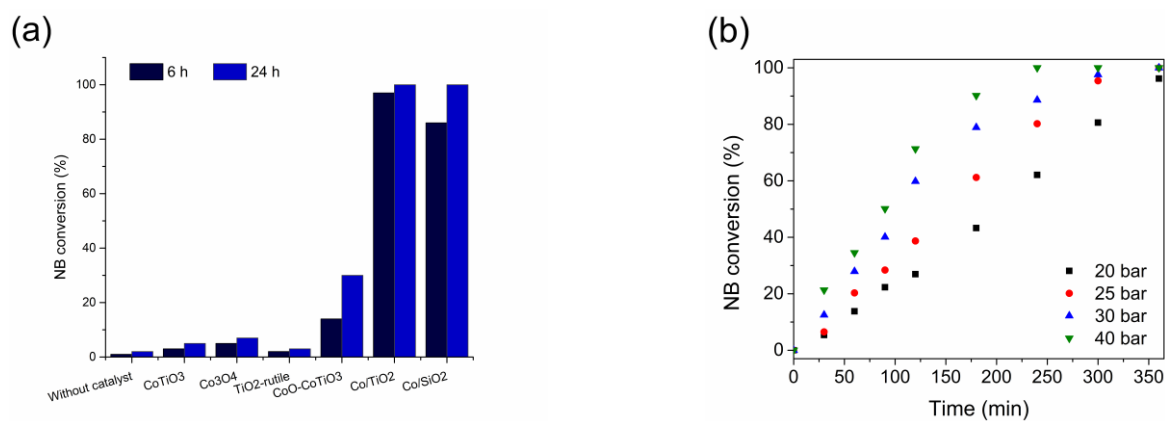

**Figure S4.** (a) The effect of non-catalyzed and different catalysts in the reductive imination of NB and BZ. Reaction conditions: Nitrobenzene (2 mmol), benzaldehyde (2 mmol), catalyst mass (20 mg), ethyl acetate (50 mL), H<sub>2</sub> (20 bar) at 120°C; and (b) Conversion vs time profiles for the Co/TiO<sub>2</sub> catalysts at different pressures.

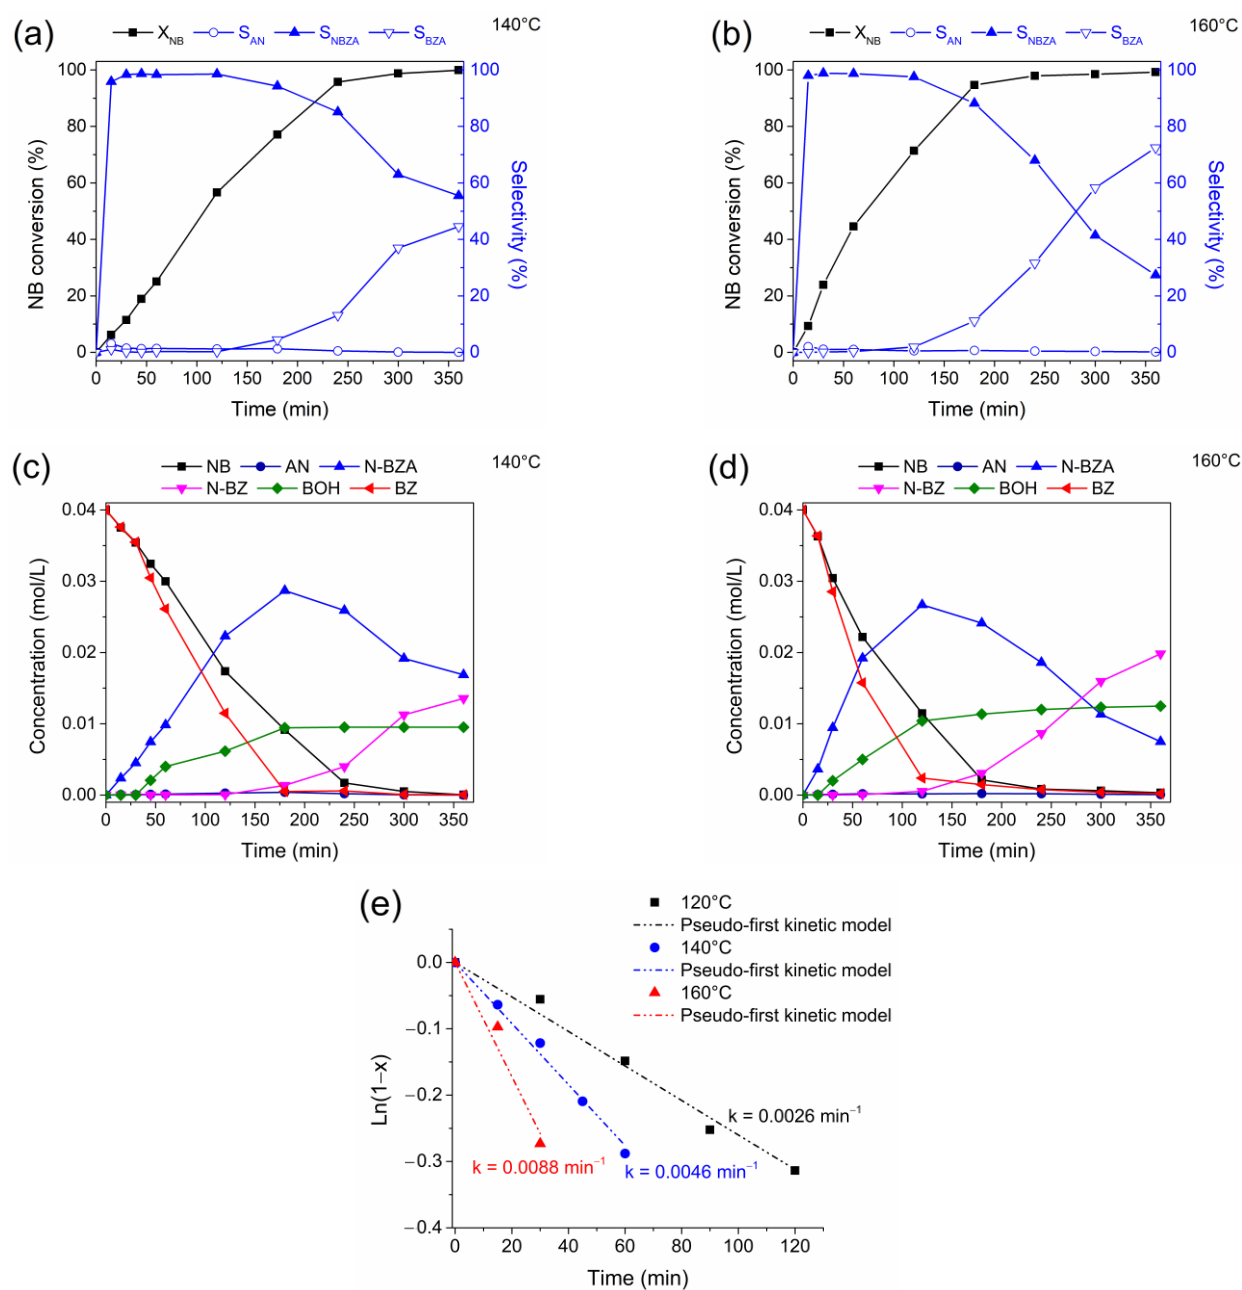

**Figure S5.** Kinetic profiles for the Co/TiO<sub>2</sub> catalysts at different temperatures. (a – b) NB conversion and *N*-based products selectivity, (c – d) products distribution in function of time and (e) pseudo-first kinetic adjustment for the NB consumption.

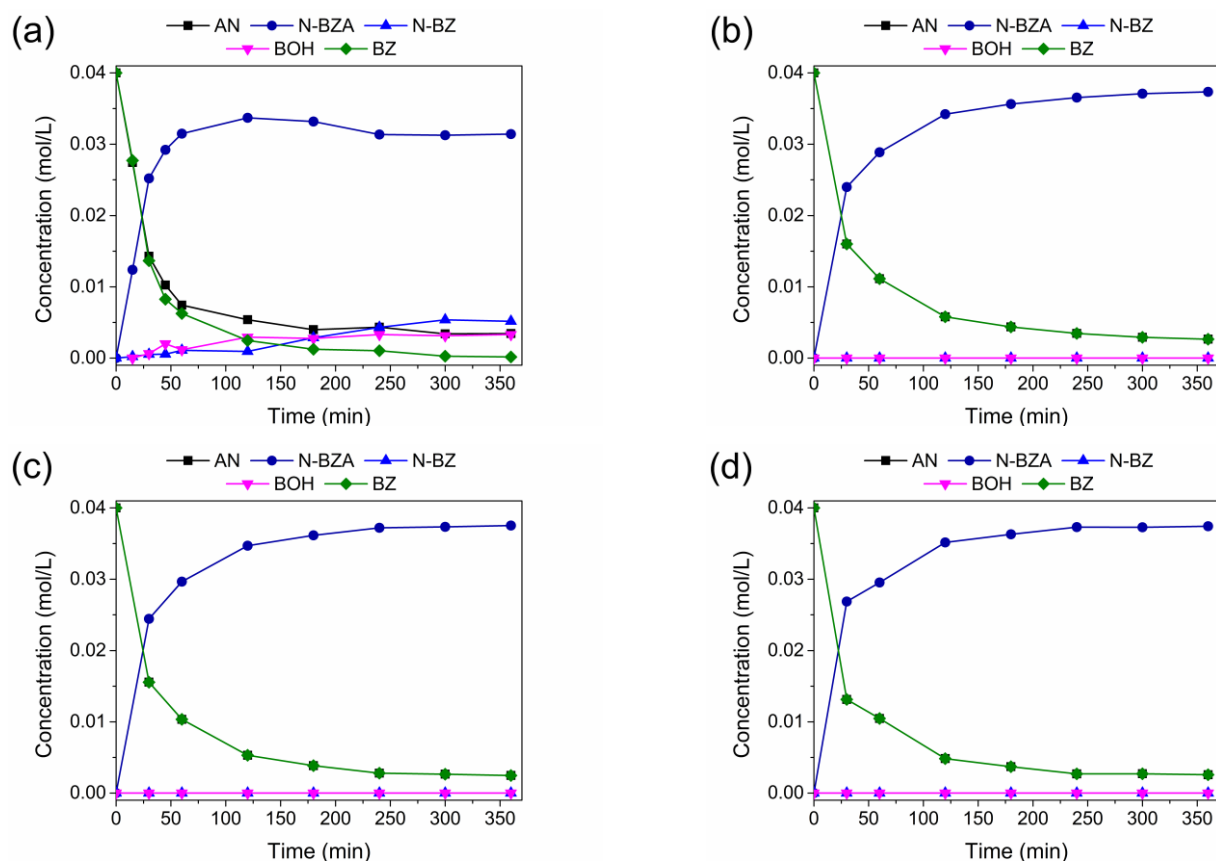

**Figure S6.** Concentration vs time profile for the control experiments for the imine-formation using AN and BZ. (a) Co/TiO<sub>2</sub> catalyst with H<sub>2</sub> at 20 bar, (b) Co/TiO<sub>2</sub> catalyst with Ar at 5 bar, (c) without catalyst with H<sub>2</sub> at 20 bar and (d) without catalyst with Ar at 5 bar. Reaction conditions: AN (2 mmol), BZ (2 mmol), catalyst (20 mg), ethyl acetate (50 mL), and 120°C.

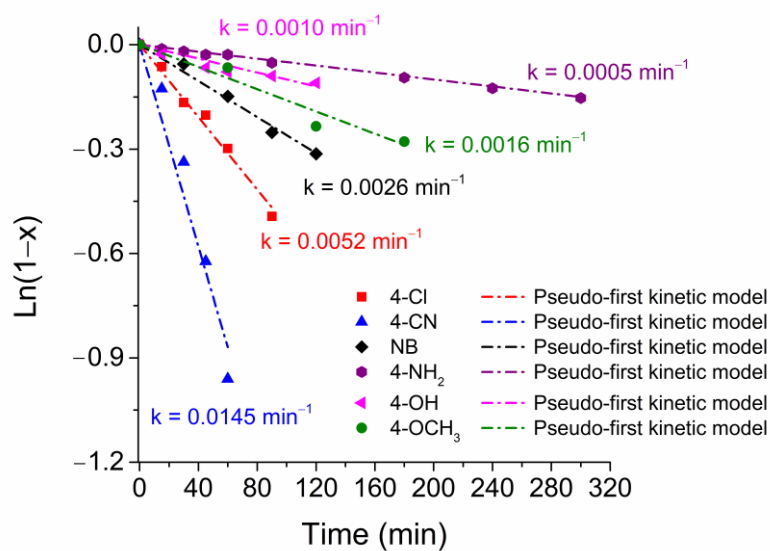

**Figure S7.** Pseudo-first kinetic adjustment for the conversion profiles of different 4-substituted NB substrates.

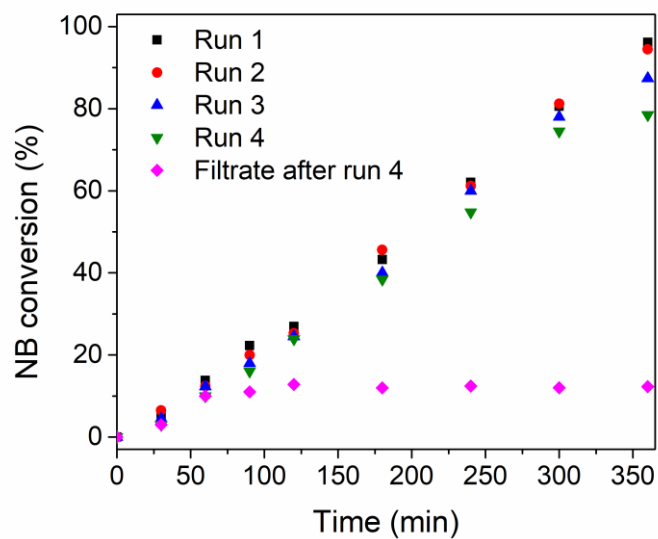

**Figure S8.** Reusability and hot filtration after the fourth cycle of Co/TiO<sub>2</sub> catalysts for NB reductive imination with BZ.



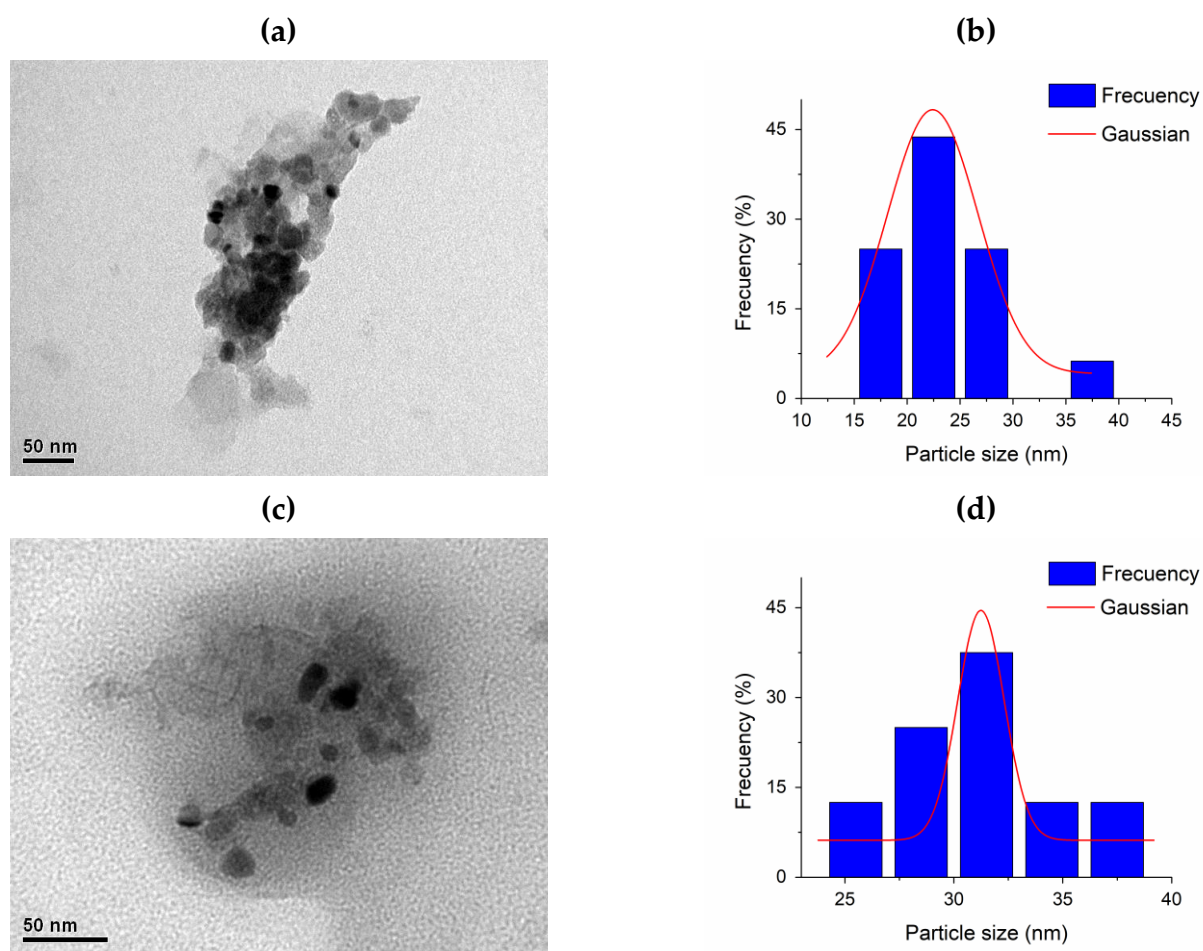

**Figure S9.** TEM post-reaction for the Co/TiO<sub>2</sub> catalyst. (a) after 4th cycle, (b) Co-NPs size distribution, (b) after catalyst regeneration and (d) Co-NPs size distribution.
